# Supplementary material
Source: HighWire-hosted journal article supplement (doi:10.1101/rna.070052.118)
Supplement: Supplemental_Legends.docx [file Supplemental_Legends.docx]

**Supplementary Data**

**Table S1**. Characteristics of the 25 gene expression datasets used in the present study for the inference of genome ancestry. The continental ancestry memberships inferred from each dataset are also indicated.

**Table S2**. Samples that were finally used for the 25 population datasets explored in the present study. Geographic origin, ID, etc., are indicated.

**Table S3**. Number of SNPs that were finally used for the eight populations datasets that passed through all the quality control filters and proportion of SNPs sharing between these datasets.

**Figure S1.** Quality plots for the databases explored in the present study that met the minimum standards of quality. The Y-axis represents the quality scores; higher scores denote better base call. The background color indicates ranges of high (green), intermediate (orange) and low (red) quality. It is not infrequent to observe a lower quality of the base call towards the 3’ end of the sequences. An orange line indicates that the lower quartile for any base is lower than 10, or that the median for any base is less than 25. A red line indicates that the lower quartile for any base is less than five or that the median for any base is less than 20.

**Figure S2.** Quality plots for the databases explored in the present study for the inference of ancestry that are below the minimum standards of quality. See legend of **Figure S1** for more details.

**Figure S3**. Gene expression array patterns in the study by Obermoser et al. (2013) on influenza and pneumococcal vaccines.

**Figure S4**. Location of the sequencing reads for the housekeeping *CHMP2A* gene in the eight gene expression studies that passed all the quality filters.

**Figure S5**. MDS plots and ancestry barplots of four datasets derived from deficient RNAseq data, but still showing coherent patterns of genome ancestry (**Figure S1**).

**Figure S6**. MDS plots and ancestry barplots of datasets that show unusual patterns of variation. In all these cases, the RNAseq data from which the SNPs where inferred showed important deficiencies (**Figure S1**).

**Figure S7**. MDS plot of gene expression patterns of samples analyzed in the Tian et al. (2017) study on the immune response of patients infected by dengue virus. Red dots indicate expression profiles for controls recruited in San Diego (USA), while blue triangles represent cases recruited in Sri Lanka.
