# Supplementary material
Source: HighWire-hosted journal article supplement (doi:10.1101/rna.070052.118)
Supplement: Supplemental_Table_S1.xlsx [file Supplemental_Table_S1.xlsx]

## Sheet: Table S1
Table S1. Characteristics of the 25 gene expression datasets used in the present study for the inference of genome ancestry. The continental ancestry memberships inferred from each dataset are also indicated.
								Sample size		Markers / SNPs				Percentages of ancestry
ID nº in map of Figure 1	Label ID in figures	GEO acc. nº	Country/Region	Study goal	Instrument	Total average reads (millions)	Tissue	Total sample size	Sample size after quality control	Nº markers	Annotated SNPs	SNPs after quality control	Final set of SNPs [after LD filtering]	Afican	Native American	East Asian	European	Reference
1	Afghanistan	PRJNA422130	Afghanistan	Response to tb infection	Illumina HiSeq 4000	27.69	Blood	7	7	303885	285162	35550	22375	−	−	−	−	Singhania A et al., "A modular transcriptional signature identifies phenotypic heterogeneity of human tuberculosis infection.", Nat Commun, 2018 Jun 19;9(1):2308
2	Burkina-Faso	PRJNA392116	Burkina-Faso	Response to Malaria	Illumina HiSeq 2500	29.69	Blood	50	50	2658827	2308596	86853	58841	−	−	−	−	Quin JE et al., "Major transcriptional changes observed in the Fulani, an ethnic group less susceptible to malaria.", Elife, 2017 Sep 19;6
3	China_1	PRJNA296108	China	Pneumonia	Illumina HiSeq 2000	9.99	Blood	9	9	135107	127671	9640	7807	0.0144843	−	0.971041	0.0144749	Yu, X., Gu, P., Huang, Z., Fang, X., Jiang, Y., Luo, Q., ... & Fan, L. (2017). Reduced expression of BMP3 contributes to the development of pulmonary fibrosis and predicts the unfavorable prognosis in IIP patients. Oncotarget, 8(46), 80531.
4	China_2	PRJNA412314	China	Hepatocellular carcinoma	Illumina HiSeq 2500	69.88	Tumor	9	9	2280163	2102689	62192	39198	0.0240644	−	0.975827	0.000108889	Hong, W., Zhang, C. Z., Lu, S. X., Zhang, M. F., Liu, L. L., Luo, R. Z., ... & Xie, D. (2018). A CCDC 50 splice variant is modulated by SRSF 3 and promotes hepatocellular carcinoma via the Ras signaling pathway. Hepatology.
5	China_3	PRJNA134241	China	Hepatocellular carcinoma	Illumina Genome Analyzer	18.7	Tumor	10	10	534571	510872	6843	5591	0.0655617	−	0.919392	0.015047	Huang Q et al., "RNA-Seq analyses generate comprehensive transcriptomic landscape and reveal complex transcript patterns in hepatocellular carcinoma.", PLoS One, 2011 Oct 17;6(10):e26168
6	Colombia_1	PRJNA395937	Colombia	Breast cancer	Illumina Genome Analyzer IIx	6.32	Tumor	33	28	1512644	1440613	253	229	-	−	−	−	Serrano-Gómez SJ et al., "Ancestry as a potential modifier of gene expression in breast tumors from Colombian women.", PLoS One, 2017 Aug 23;12(8):e0183179
7	Colombia_2	PRJNA279199	Colombia	Malaria	Illumina HiSeq 2500	0.7	Blood	12	12	173825	152546	5346	4214	0.301319	0.435905	0.00504075	0.257735	Rojas-Peña ML et al., "Transcription Profiling of Malaria-Naïve and Semi-immune Colombian Volunteers in a Plasmodium vivax Sporozoite Challenge.", PLoS Negl Trop Dis, 2015 Aug 5;9(8):e0003978
8	A. American'	PRJNA341854	African-American'; USA	Obesity	Illumina HiSeq 2500	16.37	CD4+T cells	14	11	43327	42219	7880	6703	0.300075	0.341025	0.00313236	0.355767	Rastogi D et al., "CDC42-related genes are upregulated in helper T cells from obese asthmatic children.", J Allergy Clin Immunol, 2017 May 4;141(2):539-548.e7
9	Hispanic'	PRJNA341854	Hispanic'; USA	Obesity	Illumina HiSeq 2500	14.32	CD4+T cells	23	22	43327	42219	7880	6703	0.621749	0.237359	0.00573573	0.135156	Rastogi D et al., "CDC42-related genes are upregulated in helper T cells from obese asthmatic children.", J Allergy Clin Immunol, 2017 May 4;141(2):539-548.e7
10	Kenya	PRJNA422130	Kenya	Response to tb infection	Illumina HiSeq 4000	29.79	Blood	10	10	355994	334161	35495	24171	−	−	−	−	Singhania A et al., "A modular transcriptional signature identifies phenotypic heterogeneity of human tuberculosis infection.", Nat Commun, 2018 Jun 19;9(1):2308
11	Malaysia	PRJNA238241	Malaysia	Obesity	Illumina HiSeq 2000	48	Adipose tissue	6	6	1670087	1559776	64858	39576	−	−	−	−	Ng, H. F., Chin, K. F., Chan, K. G., & Ngeow, Y. F. (2015). The mRNA expression of soluble urokinase plasminogen activator surface receptor in human adipose tissue is positively correlated with body mass index. Genome, 58(6), 315-321.
12	Mexico	PRJNA285798	Mexico	Response to infectious diarrhea	Illumina HiSeq 2500	8.04	Blood	85	83	707672	641522	22908	18180	0.0363058	0.826922	0.0076591	0.129113	DeBerg, H. A., Zaidi, M. B., Altman, M. C., Khaenam, P., Gersuk, V. H., Campos, F. D., ... & Estrada-Garcia, T. (2018). Shared and organism-specific host responses to childhood diarrheal diseases revealed by whole blood transcript profiling. PloS one, 13(1), e0192082.
13	Russia	PRJNA350714	Russia	Prostate Cancer	Ion Torrent Proton	7.8	Paraffin-embedded tumor	31	30	1272969	557495	690	558	0.086813	−	0.0349871	0.8782	Nikitina AS et al., "Novel RNA biomarkers of prostate cancer revealed by RNA-seq analysis of formalin-fixed samples obtained from Russian patients.", Oncotarget, 2017 May 16;8(20):32990-33001
14	S. Africa_1	PRJNA422129	South Africa	response to tb infection	Illumina HiSeq 4000	28.7	Blood	21	19	133887	127674	68668	51763	0.962654	−	0.00497505	0.00497505	Berry, M. P. et al. An interferon-inducible neutrophil-driven blood transcriptional signature in human tuberculosis. Nature 466, 973–977 (2010).
15	S. Africa_2	PRJNA309415	South Africa	Response to HIV	NextSeq 500	11.3	Innate Lymphoid Cells	38	34	1236990	1152737	234	181	−	−	−	−	Kløverpris HN et al., "Innate Lymphoid Cells Are Depleted Irreversibly during Acute HIV-1 Infection in the Absence of Viral Suppression.", Immunity, 2016 Feb 2;44(2):391-405
16	S. Korea_1	PRJNA218851	South Korea	Colon cancer	Illumina HiSeq 2000	56.53	Tumor	16	16	1157574	1047833	66073	44063	0.0173666	−	0.98127	0.00136381	Kim SK et al., "A nineteen gene-based risk score classifier predicts prognosis of colorectal cancer patients.", Mol Oncol, 2014 Jul 4;8(8):1653-66
17	S. Korea_2	PRJNA163279	South Korea	Lung Cancer	Illumina Genome Analyzer IIx	72.69	Tumor	6	5	4247003	3933426	11	7	−	−	−	−	Kim SC et al., "A high-dimensional, deep-sequencing study of lung adenocarcinoma in female never-smokers.", PLoS One, 2013 Feb 6;8(2):e55596
18	Spain	-	Spain	Response to rotavirus	Illumina HiSeq 2000	59.03	Blood	20	20	3092457	2728828	82178	43681	0.0514587	−	6.8e-05	0.948473	Salas, A., Marco-Puche, G., Triviño, J. C., Gómez-Carballa, A., Cebey-López, M., Rivero-Calle, I., ... & Martinón-Torres, F. (2016). Strong down-regulation of glycophorin genes: A host defense mechanism against rotavirus infection. Infection, Genetics and Evolution, 44, 403-411.
19	Sudan	PRJNA422130	Sudan	Response to tb infection	Illumina HiSeq 4000	30.84	Blood	4	4	1100652	1093085	7666	2029	−	−	−	−	Singhania A et al., "A modular transcriptional signature identifies phenotypic heterogeneity of human tuberculosis infection.", Nat Commun, 2018 Jun 19;9(1):2308
20	Sweden	PRJNA354367	Sweden	Rheumatoid arthritis	Illumina HiSeq 2000	42.51	Blood	14	14	505076	456586	40836	27703	0.0491646	−	0.0302215	0.920614	Shchetynsky K et al., "Discovery of new candidate genes for rheumatoid arthritis through integration of genetic association data with expression pathway analysis.", Arthritis Res Ther, 2017 Feb 2;19(1):19
21	Taiwan	PRJNA318782	Taiwan,China	Gastric Cancer	Illumina MiSeq	0.7	Tumor	110	71	1449	1438	7	7	−	−	−	−	Hsieh, Y. Y., Tung, S. Y., Pan, H. Y., Yen, C. W., Xu, H. W., Deng, Y. F., ... & Li, C. (2018). Upregulation of bone morphogenetic protein 1 is associated with poor prognosis of late-stage gastric Cancer patients. BMC cancer, 18(1), 508.
22	Tanzania	PRJNA422130	Tanzania	Response to tb infection	Illumina HiSeq 4000	22.95	Blood	5	5	163265	152967	14828	10944	−	−	−	−	Singhania A et al., "A modular transcriptional signature identifies phenotypic heterogeneity of human tuberculosis infection.", Nat Commun, 2018 Jun 19;9(1):2308
23	Uganda	PRJNA422130	Uganda	Response to tb infection	Illumina HiSeq 4000	37.1	Blood	4	4	174396	164130	27142	17618	−	−	−	−	Singhania A et al., "A modular transcriptional signature identifies phenotypic heterogeneity of human tuberculosis infection.", Nat Commun, 2018 Jun 19;9(1):2308
24	United Kingdom	PRJNA294293	United Kingdom	Neck cancer	Illumina HiSeq 2000	9.01	Tumor	22	21	440530	414846	12311	10210	0.0231498	−	0.00802719	0.968823	Wood O et al., "Gene expression analysis of TIL rich HPV-driven head and neck tumors reveals a distinct B-cell signature when compared to HPV independent tumors.", Oncotarget, 2016 Aug 30;7(35):56781-56797
25	Zambia	PRJNA392660	Zambia	Sarcoma kaposi	Sarcoma kaposi	14.52	Tissue	8	8	153663	141203	23188	18536	−	−	−	−	Tso FY et al., "RNA-Seq of Kaposi's sarcoma reveals alterations in glucose and lipid metabolism.", PLoS Pathog, 2018 Jan 19;14(1):e1006844
