# Supplementary material
Source: HighWire-hosted journal article supplement (doi:10.1101/rna.070052.118)
Supplement: Supplemental_Table_S3.xlsx [file Supplemental_Table_S3.xlsx]

## Sheet: Table S3
Table S3. Number of SNPs that were finally used for the populations datasets that passed through all the quality control filters and proportion of SNPs sharing between these datasets.
		Nº of SNPs	Number of shared SNPs
			China_2	Colombia_2	Mexico	S. Korea_1	Spain	Sweden	UK
	China_1	9640	7361 (76.4%)	1774 (18.4%)	4939 (51.2%)	7884 (81.8%)	5651 (58.6%)	5625 (58.4%)	4148 (43%)
			China_1	Colombia_2	Mexico	S. Korea_1	Spain	Sweden	UK
	China_2	62192	7361 (11.8%)	2589 (4.2%)	9108 (14.6%)	32613 (52.4%)	26015 (41.8%)	16673 (26.8%)	6065 (9.8%)
			China_1	China_2	Mexico	S. Korea_1	Spain	Sweden	UK
	Colombia_2	5346	1774 (33.2%)	2589 (48.4%)	3696 (69.1%)	2781 (52%)	2930 (54.8%)	3396 (63.5%)	1819 (34%)
			China_1	China_2	Colombia_2	S. Korea_1	Spain	Sweden	UK
	Mexico	22908	4939 (21.6%)	9108 (39.8%)	3696 (16.1%)	10483 (45.8%)	11242 (49.1%)	13439 (58.7%)	5740 (25.1%)
			China_1	China_2	Colombia_2	Mexico	Spain	Sweden	UK
	S. Korea_1	66073	7884 (11.9%)	32613 (49.4%)	2781 (4.2%)	10483 (15.9%)	30948 (46.8%)	19562 (29.6%)	6740 (10.2%)
			China_1	China_2	Colombia_2	Mexico	S. Korea_1	Sweden	UK
	Spain	82178	5651 (6.9%)	26015 (31.7%)	2930 (3.6%)	11242 (13.7%)	30948 (37.7%)	26510 (32.3%)	6610 (8%)
			China_1	China_2	Colombia_2	Mexico	S. Korea_1	Spain	UK
	Sweden	40836	5625 (13.8%)	16673 (40.8%)	3396 (8.3%)	13439 (32.9%)	19562 (47.9%)	26510 (64.9%)	7001 (17.1%)
			China_1	China_2	Colombia_2	Mexico	S. Korea_1	Spain	Sweden
	UK	12311	4148 (33.7%)	6065 (49.3%)	1819 (14.8%)	5740 (46.6%)	6740 (54.7%)	6610 (53.7%)	7001 (56.9%)
	Nº of datasets	Shared SNPs	Percentage
	1	100170	0.61
	2	29458	0.179
	3	15641	0.095
	4	8834	0.054
	5	4481	0.027
	6	2649	0.016
	7	2008	0.012
	8	973	0.006
	Total	164214
